# Supplementary material
Source: publisher figshare collection journal article supplement (https://sage.figshare.com/ndownloader/files/14464403)
Supplement: Supplementary file 1 [file 14464403]

**Supplementary figures legend:**

**Figure 1a, 1b: Tan's system-** is a 3-point score that grades middle cerebral artery (MCA) collaterals in the affected area. It can be performed rapidly in acute situations. The grade assigned are – 0 (absent collaterals, **Figure 1a**), 1 (<50% of the affected area, not shown) or 2 (50% or more of the affected area, **Figure 1b**).

**Figure 2a-2d: Maas system-** is a 5-point score that compares collaterals on the affected hemisphere against the unaffected side. It uses the Sylvian fissure vessels or leptomeningeal collaterals as internal control and enables a rapid scoring. The scores range from 1 (no vessels opacification, **Figure 2a**), 2 (less than contralateral side, **Figure 2b**), 3 (equal to the contralateral side, not shown), 4 (more than the contralateral side, **Figure 2c**) and 5 (exuberant, **Figure 2d**).

**Figure 3a- 3c: Miteff's system-** is a 3-point score that grades middle cerebral artery collateral branches with respect to the Sylvain fissure and can be performed rapidly. The grade assigned are – 3 (if the vessels are reconstituted distal to the occlusion, **Figure 3a**), 2 (vessels can be seen at the Sylvian fissure, **Figure 3b**) or 1 (when the contrast opacification is merely seen in the distal superficial branches, **Figure 3c**).

**Thrombectomy procedure:**

At our institution, each interventionalist has free choice on device and technique. Though commonly, in the anterior circulation, an 8 or 9 French balloon guide catheter (BGC) is advanced to the cervical internal carotid artery with the support of a long 80cm Arrow sheath (Teleflex, USA). Whereas in the posterior circulation, a 6 French Envoy guiding catheter is advanced through a 65cm arrow sheath into either vertebral artery. A 0.021 microcatheter is navigated through the occlusion and the EmboTrap is optimally positioned into the clot. After balloon inflation of the BGC, the EmboTrap is retracted into the BGC with manual aspiration using a large 50cc syringe for flow reversal. Alternatively, a distal access catheter is sometimes used and positioned just proximal to the occlusion, and the EmboTrap is fully or partially retrieved into it under aspiration in both the distal access catheter and the BGC. Standard angiographic runs are taken before and after the procedure and between thrombectomy attempts based on operator preference. Additionally, with experience and confidence in using the device, we adapted our technique by abandoning the 'waiting time' after device deployment. The runs to show passage of contrast through the opened device were also abandoned since this did not influence our decision making in any way.

**Stroke imaging CT protocol specification:**

Discovery CT750HD (GE Healthcare, Waukesha, WI, USA)

| Stroke protocol | kV-peak | CTDIvol(16cm) | DLP       | Duration |
|-----------------|---------|---------------|-----------|----------|
| NECT            | 120     | around 45     | 600 - 865 |          |

|                   |    |         |           |        |
|-------------------|----|---------|-----------|--------|
| CTA, younger      | 80 | 8       | 280       |        |
| CTA older         | 80 | 14 - 18 | 590 - 690 |        |
| mCTA              | 80 | 9-12    | 850       |        |
| CTP 8cm younger   | 80 | 70      | 555       | 45 sec |
|                   |    |         |           |        |
| CTP 8cm older     | 80 | 101     | 806       |        |
| CTP 12 cm younger | 80 | 206     | 1960      |        |
| CTP 12 cm older   | 80 | 277     | 2630      | 66 sec |
|                   |    |         |           |        |

Multimodal CT stroke protocol with NECT/ CTA/ CTP with different protocols with typical specifications as above. All values are approximate and of course differs from examination to examination.

|                                   | Univariate Analysis patients with MCA occlusion |                |                  | Multivariate Analysis             |                  |
|-----------------------------------|-------------------------------------------------|----------------|------------------|-----------------------------------|------------------|
|                                   | mRS 0-2 (n=53)                                  | mRS 3-6 (n=46) | P-value          | Adjusted Odds Ratio<br>(95% C.I.) | P-value          |
| Age, mean (SD), year              | 64.4 (12.2)                                     | 70.4. (10.9)   | 0.092            |                                   |                  |
| Male                              | 30/53                                           | 25/46          | 0.491            |                                   |                  |
| Intravenous tPA                   | 23/53                                           | 19/46          | 0.581            |                                   |                  |
| Recent stroke                     | 2/53                                            | 0/46           | 0.497            |                                   |                  |
| General Anesthesia                | 4/53                                            | 4/46           | 1.000            |                                   |                  |
| NIHSS at onset,<br>median (range) | 11 (3-25)                                       | 16 (3-29)      | <b>&lt;0.001</b> | 0.78 (0.69-0.88)                  | <b>&lt;0.001</b> |
| Tan good collaterals              | 47/53                                           | 33/46          | 0.043            | 2.21 (0.62-7.82)                  | 0.216            |

|                                                      |             |               |              |                      |      |
|------------------------------------------------------|-------------|---------------|--------------|----------------------|------|
| Mlteff good collaterals                              | 47/53       | 36/46         | 0.181        |                      |      |
| Maas good collaterals                                | 17/53       | 12/46         | 0.513        |                      |      |
| Patent ACOMM                                         | 53/53       | 40/46         | <b>0.008</b> | 22.8 (0.01 – 222.07) | 0.99 |
| Patent PCOMM                                         | 28/53       | 20/46         | 0.422        |                      |      |
| mTICI 2b/3                                           | 47/53       | 35/46         | 0.082        |                      |      |
| Number of attempts,<br>median (range)                | 2 (1-10)    | 3 (1-9)       | 0.127        |                      |      |
| Onset-to-puncture<br>time, mean, (SD),min            | 292 (149.0) | 301.3 (167.5) | 0.784        |                      |      |
| Puncture-to-<br>reperfusion time,<br>mean, (SD), min | 60.0 (44.4) | 67.5 (44.4)   | 0.389        |                      |      |

**Supplementary Table 1.** Results of univariate and multivariate analysis of patients with MCA occlusion : predictors of good functional outcomes. tPA- tissue plasminogen activator, NIHSS- national institute of health stroke scale, TICI – thrombolysis in cerebral infarction scale. ACOMM – anterior communicating artery, PCOMM- posterior communicating artery

|                      | Univariate Analysis Patients with MCA occlusion |             |         | Multivariate Analysis             |         |
|----------------------|-------------------------------------------------|-------------|---------|-----------------------------------|---------|
|                      | Mortality, n=10                                 | Alive n=89  | P-value | Adjusted Odds Ratio<br>(95% C.I.) | P-value |
| Age, mean (SD), year | 68.4 (11.7)                                     | 67.3 (12.9) | 0.784   |                                   |         |
| Male                 | 5/10                                            | 50/89       | 0.747   |                                   |         |
| Intravenous tPA      | 2/10                                            | 40/89       | 0.290   |                                   |         |
| Recent stroke        | 0/10                                            | 2/89        | 0.805   |                                   |         |
| General Anesthesia   | 0/10                                            | 8/89        | 1.000   |                                   |         |
| Tan good collaterals | 9/10                                            | 71/89       | 0.682   |                                   |         |

|                                       |             |           |              |                    |       |
|---------------------------------------|-------------|-----------|--------------|--------------------|-------|
| Miteff good collaterals               | 8/10        | 75/89     | 0.662        |                    |       |
| Maas good collaterals                 | 2/10        | 27/89     | 0.719        |                    |       |
| Patent ACOMM                          | 9/10        | 84/89     | 0.491        |                    |       |
| Patent PCOMM                          | 2/10        | 46/89     | 0.056        |                    |       |
| NIHSS at onset,<br>median (range)     | 13.5 (2-23) | 15 (2-29) | 0.453        |                    |       |
| mTICI 2b/3                            | 6/10        | 76/89     | 0.066        |                    |       |
| Number of attempts,<br>median (range) | 4 (1-10)    | 2 (1-8)   | <b>0.013</b> | 1.63 (0.89 – 3.00) | 0.113 |

|                                                      |              |             |              |                         |              |
|------------------------------------------------------|--------------|-------------|--------------|-------------------------|--------------|
| Onset-to-puncture,<br>mean (SD), min                 | 194.3 (43.4) | 308 (160.5) | <b>0.039</b> | <b>1.00 (1.00-1.00)</b> | <b>0.047</b> |
| Puncture-to-<br>reperfusion time,<br>mean, (SD), min | 91.1 (45.3)  | 60.3 (43.4) | <b>0.039</b> | 1.00 (0.99- 1.00)       | 0.674        |

**Supplementary table 2.** Results of univariate and multivariate analysis of patients with MCA occlusion: predictors of mortality. tPA- tissue plasminogen activator, NIHSS- national institute of health stroke scale, TICl – thrombolysis in cerebral infarction scale. ACOMM – anterior communicating artery, PCOMM- posterior communicating artery

**Studies showing incidence of ACOMM on CT-angiogram studies.**

Incidence of complete Anterior circle of Willis:

| Reference       | % of complete anterior circle of Willis |
|-----------------|-----------------------------------------|
| Qi Li et al     | 79%                                     |
| Waaijer A et al | 80%                                     |
| Hilal et al     | 82.8%                                   |
| Varga et al     | 67.8%                                   |

References:

1. Qi Li, Jialun Li, Fajin Lv, Kewei Li, Tianyou Luo, Peng Xie, A multidetector CT angiography study of variations in the circle of Willis in a Chinese population, Journal of Clinical Neuroscience, 2011, Pages 379-383,
2. Waaijer A, van Leeuwen M, S, van der Worp H, B, Verhagen H, J, M, Mali W, P, T, M, Velthuis B, K: Anatomic Variations in the Circle of Willis in Patients with Symptomatic Carotid Artery Stenosis Assessed with Multidetector Row CT Angiography. Cerebrovasc Dis 2007;23:267-274. doi: 10.1159/000098326
3. Hilal Siahin, Yeliz Pekçevik. Anatomical variations of the circle of Willis: evaluation with CT angiography. Anatomy 2018;12(1):20–26

4. Varga, A., Di Leo, G., Banga, P.V. et al. Multidetector CT angiography of the Circle of Willis: association of its variants with carotid artery disease and brain ischemia. *Eur Radiol* (2019) 29: 46.
